# Supplementary material
Source: PubMed Central journal article supplement (PMC5716870)
Supplement: NIHMS913293-supplement-1.pdf [file NIHMS913293-supplement-1.pdf]

sensitization                      challenge

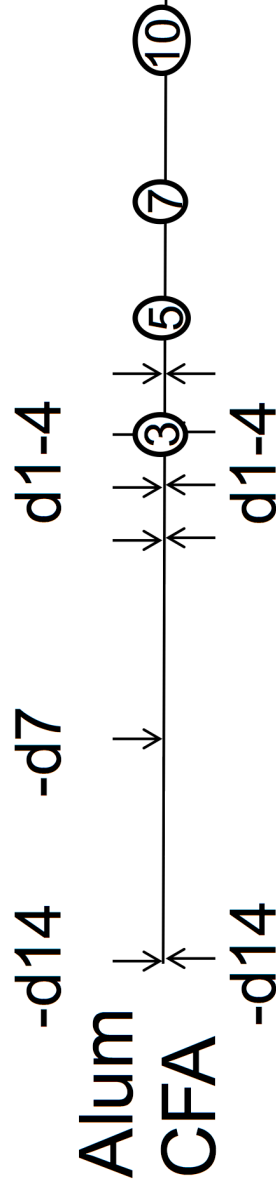

**Supplementary Figure S1. Experimental scheme.** Mice were sensitized with cockroach antigens (5 $\mu$ g) either in Alum adjuvant (twice at day -14 and -7) or in CFA adjuvant (once at day -14). Starting at day 1, mice were intranasally challenged with cockroach antigen (5mg) in PBS for 4 consecutive days. Mice were sacrificed at different time points (circle). Typically, they were sacrificed 24 hours after the last antigen challenge (referred to as day 5). In some experiments, mice were sacrificed at different dates shown in this Figure (days 3, 7, and 10).

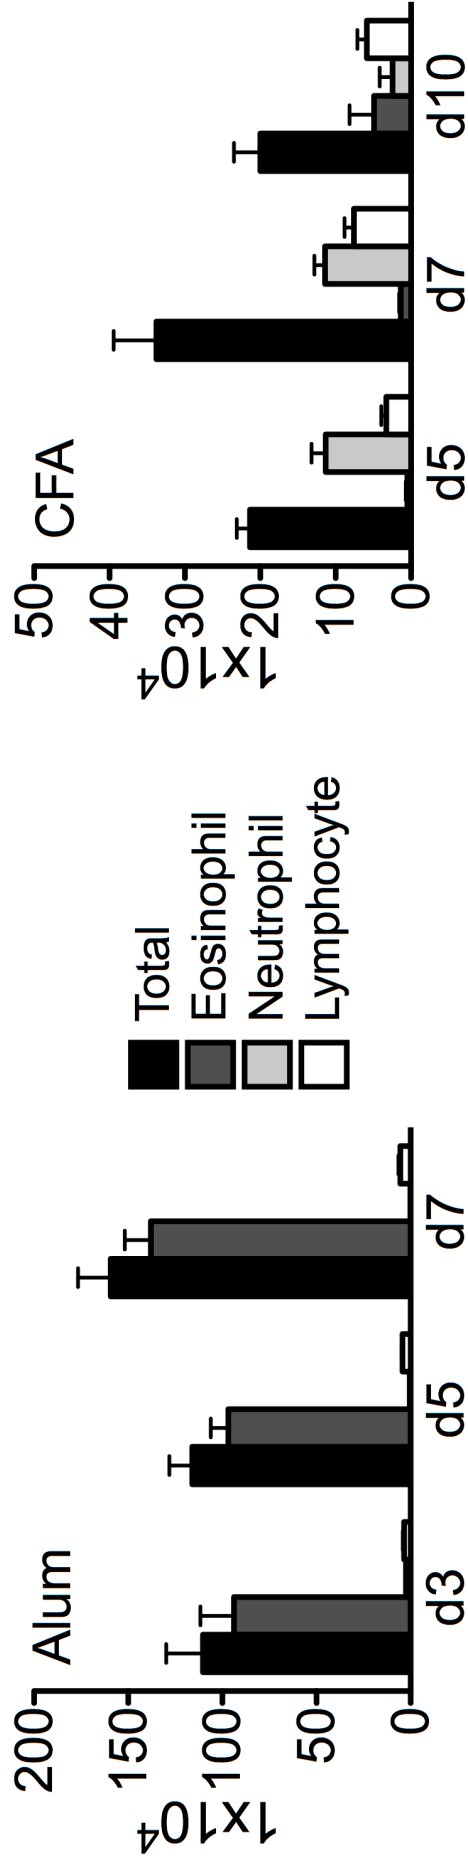

**Supplementary Figure S2. BAL cell profiles.** Mice sensitized with cockroach antigen in Alum adjuvant or in CFA adjuvant were challenged with the antigen starting at day 1 for 4 consecutive days (Supp Fig S1). Mice were sacrificed at days 3, 5, 7, and 10. BAL cells were stained for Siglec F, Ly6G, and CD4. Graphs shown represent the mean  $\pm$  SD of 4-5 individually tested mice.

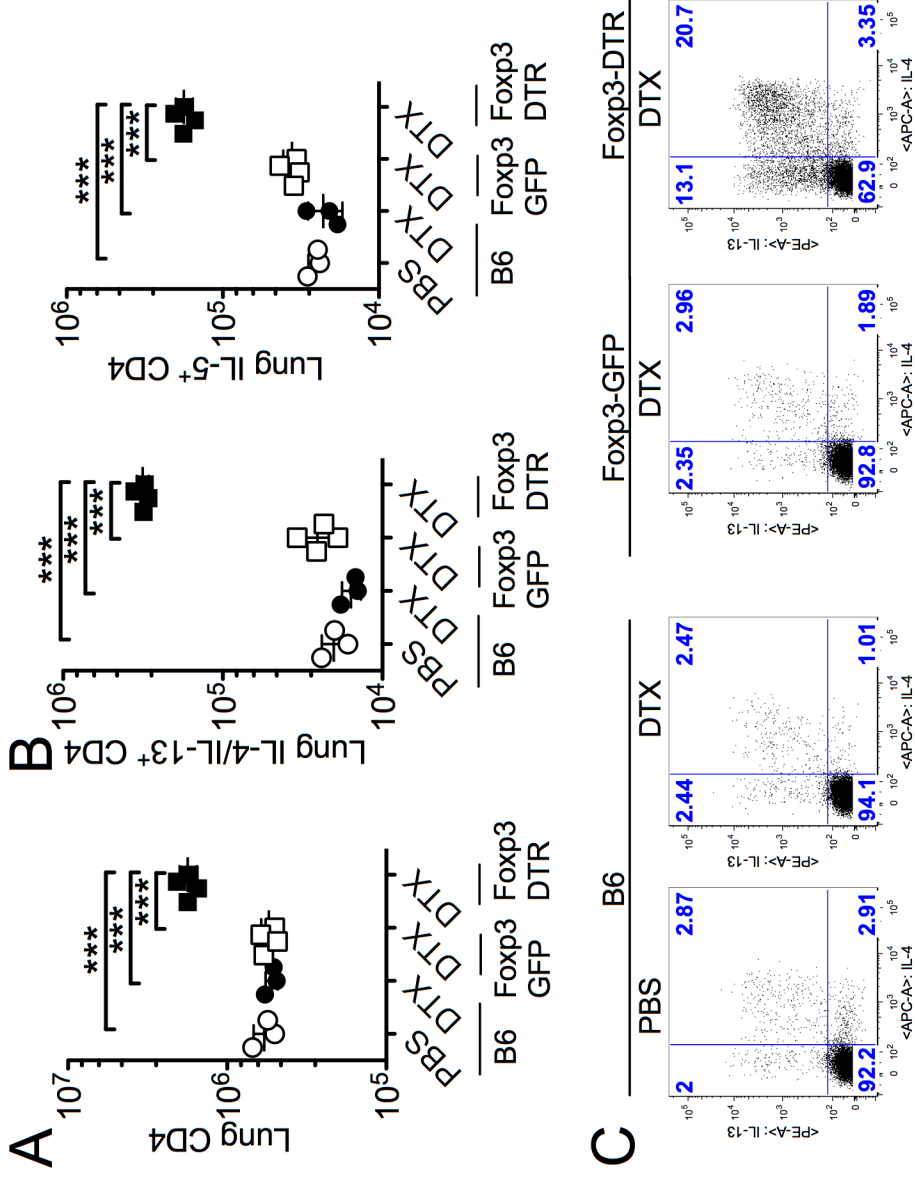

**Supplementary Figure S3. Allergic immune responses after DTX treatment in B6 mice.** Utilizing B6 mice, cockroach sensitization in Alum adjuvant, DEX injection, and intranasal allergen challenge were performed as described in Fig 3A. PBS injection instead of DEX was used as a negative control. Infiltration of inflammatory cells and T cell cytokine expression were determined as shown in Fig 3.
